# Supplementary material for: Mass mortality of pearl oyster (Pinctada fucata (Gould)) in Japan in 2019 and 2020 is caused by an unidentified infectious agent
Source: PeerJ. 2021 Sep 21;9:e12180. doi: 10.7717/peerj.12180 (PMC8462378; doi:10.7717/peerj.12180)
Supplement: Supplemental Information 3 — Shell scores of each survived pearl oysters. [file peerj-09-12180-s003.xlsx]

## Sheet: Table1
	Table 1. Summary of pearl oysters used
	Healthy pearl oysters (Recipients)
		Infection experiments	Collection sites	Age (years old)	Range in shell width (mm, mean ± SD)	Prevalence of atrophy#	Nacre abnormalities *	Raw data: Shell scores of each pearl oysters	Mean shell score
		Test 1	Ishikawa	1	45 - 57 (49.3 ± 3.7)	0/10	0/10	0,0,0,0,0,0,0,0,0,0,	0 ± 0
		Test 2	Ishikawa	1	51 - 63 (59.6 ± 3.1)	0/10	2/10	2,2,0,0,0,0,0,0,0,0,	0.4 ± 0.3
		Test 3	Kanagawa	1	45 - 56 (49.8 ± 3.6)	0/5	0/5	0,0,0,0,0,0,0,0,0,0,	0 ± 0
		Test 4	Kanagawa	1	55 - 68 (61.8 ± 2.3)	0/10	0/10	0,0,0,0,0,0,0,0,0,0,	0 ± 0
		Test 5-1	Kanagawa	1	ditto	0/10	0/10	0,0,0,0,0,0,0,0,0,0,	0 ± 0
		Test 5-2	Kanagawa	1	51 - 64 (55.0 ± 5.6)	0/5	0/5	0,0,0,0,0	0 ± 0
		Test 6-1	Kanagawa	2	51 - 65 (57.6 ± 1.4)	0/5	0/5	0,0,0,0,0	0 ± 0
		Test 6-2	Kanagawa	3	50 - 75 (15.8 ± 0.8)	0/5	1/20	1,0,0,0,0,0,0,0,0,0, 0,0,0,0,0,0,0,0,0,0,	0.1 ± 0.1
	Source of infection (Donors)
		Infection experiments	Collection sites	Age (years old)	Range in shell width (mm, mean ± SD)	Prevalence of atrophy#	Nacre abnormalities *	Raw data: Shell scores of each pearl oysters	Mean shell score	Source of inoculum	Note
		Test 1	Mie	3	73 - 60 (65.0 ± 1.5)	3/10	7/10	5,5,4,4,2,2,1,0,0,0,	2.3 ± 0.6	Hemolymph	There are traces of previous year.
		Test 2	Mie	0	NM	5/10	0/10	0,0,0,0,0,0,0,0,0,0,	0 ± 0	Supernatant of macerated tissue	Cumulative mortality rate at the time of sampling was ca. 20%. No deaths up to 6 days before sampling.
		Test 3	Mie	0	27 - 32 (29.2 ± 1.2)	2/10	4/10	5,4,2,2,0,0,0,0,0,0	1.3 ± 1.1	Supernatant of macerated tissue	Nine days before the experiment, 9 out of 10 individuals were atrophied. Mortality rate unknown.
		Test 4	Mie	0	26 - 45 (33.5 ± 2.0)	2/10	NM	NM	NM	Supernatant of macerated tissue	The same lot as in Test 3 were used.
		Test 5-1	Mie	0	28 - 41 (32.0 ± 3.3)	2/10	NM	NM	NM	Supernatant of macerated tissue	The same lot as in Test 3 were used.
		Test 5-2	Experimentally infected	1	50 - 67 (58.6 ± 3.1)	4/5	0/5	0,0,0,0,0,	0 ± 0	Hemolymph	Obtained from Test 4
		Test 6-1	Experimentally infected	1	52 - 61 (56.0 ± 2.6)	1/3	0/3	0,0,0,	0 ± 0	Hemolymph	Obtained from Test 4
		Test 6-2	Mie	0	12 - 20 (15.8 ± 0.8)	4/10	7/10	5,3,3,2,2,1,1,0,0,0,	1.7 ± 0.5	Supernatant of macerated tissue	Cumulative mortality rate at the time of sampling was ca. 33.3%. No deaths up to 2 days before sampling.
	*: The number of oysters in which nacre abnormality was observed / the number of oysters sacrificed from each group immediately before the start of the experimets. No atrophy in the soft tissues was observed in the recipient groups.
	#: The number of oysters in which the soft body was atrophied / the number of oysters sacrificed from each group immediately before the start of the experiments. Nacre abnormalities remain after the oyster recovered from the disease, and hence, it cannot be used to judge if the oyster is diseased at the time of observation.
	NM: Not measured

## Sheet: Table2
	Table 2 Prevalence of atrophy and nacre abnormalities of the pearl oysters collected in different regions and ages
	Collection dates	Collection sites	Age (years old)	Range in shell width (mean ± SD)	Prevalence of atrophy＊	Nacre abnormalities/valve＃	Mean shell score/valve	Raw data: Shell scores of each valves	Note
	Summer atrophy-free area
	2019.8.23	Ishikawa	1	49 - 67 (58.5 ± 1.0)	0/40	0/80 (0%)	0 ± 0	0,0,0,0,0,0,0,0,0,0,0,0,0,0,0,0,0,0,0,0,0,0,0,0,0,0,0,0,0,0,0,0,0,0,0,0,0,0,0,0,0,0,0,0,0,0,0,0,0,0,0,0,0,0,0,0,0,0,0,0,0,0,0,0,0,0,0,0,0,0,0,0,0,0,0,0,0,0,0,0
	2020.6.4	Ishikawa	1	42 - 66 (56.0 ± 1.8)	0/40	2/40 5%)	0.05 ± 0.04	1,1,0,0,0,0,0,0,0,0,0,0,0,0,0,0,0,0,0,0,0,0,0,0,0,0,0,0,0,0,0,0,0,0,0,0,0,0,0,0
	2019.10.22	Wakayama	0-2	29 - 55 (44.6 ± 2.5)	0/16	0/32	0 ± 0	0,0,0,0,0,0,0,0,0,0,0,0,0,0,0,0,0,0,0,0,0,0,0,0,0,0,0,0,0,0,0,0
	2019.11.1	Wakayama	0-2	29 - 55 (44.6 ± 2.5)	0/20	0/40	0 ± 0	0,0,0,0,0,0,0,0,0,0,0,0,0,0,0,0,0,0,0,0,0,0,0,0,0,0,0,0,0,0,0,0,0,0,0,0,0,0,0,0
	2020.9.10	Kanagawa	1	45 - 60 (58.8 ± 5.8)	0/30	1/60† (1.7%)	0.03 ± 0.02	1,0,0,0,0,0,0,0,0,0,0,0,0,0,0,0,0,0,0,0,0,0,0,0,0,0,0,0,0,0,0,0,0,0,0,0,0,0,0,0,0,0,0,0,0,0,0,0,0,0,0,0,0,0,0,0,0,0,0,0
	2020.10.21	Kanagawa	1	51 - 73 (61.9 ± 3.8)	0/30	0/60	0 ± 0	0,0,0,0,0,0,0,0,0,0,0,0,0,0,0,0,0,0,0,0,0,0,0,0,0,0,0,0,0,0,0,0,0,0,0,0,0,0,0,0,0,0,0,0,0,0,0,0,0,0,0,0,0,0,0,0,0,0,0,0
	Summer atrophy-epidemic area
	Before summer atrophy epidemic
	2014.4.15 !	Mie	2	53-71 (59.8 ± 1.2)	NM	0/19	0 ± 0	0,0,0,0,0,0,0,0,0,0,0,0,0,0,0,0,0,0,0,0,0,0,0,0,0,0,0,0,0,0,0,0,0,0,0,0,0,0,0
	2014.7.19 !	Mie	2	53-64 (53.3±2.3)	NM	0/42	0 ± 0	0,0,0,0,0,0,0,0,0,0,0,0,0,0,0,0,0,0,0,0,0,0,0,0,0,0,0,0,0,0,0,0,0,0,0,0,0,0,0,0,0,0
	2017.4.21 !	Mie	1	39-54 (46.2±0.6)	NM	1/82† (2.4%)	0.05 ± 0.05	1,0,0,0,0,0,0,0,0,0,0,0,0,0,0,0,0,0,0,0,0,0,0,0,0,0,0,0,0,0,0,0,0,0,0,0,0,0,0,0,0,0,0,0,0,0,0,0,0,0,0,0,0,0,0,0,0,0,0,0,0,0,0,0,0,0,0,0,0,0,0,0,0,0,0,0,0,0,0,0,0,0
	2017.5.1 !	Mie	1	60-74 (64.2 ±1.1)	NM	1/17† (0.6%)	0.1 ± 0.1	2,0,0,0,0,0,0,0,0,0,0,0,0,0,0,0,0,
	2019.4.25!	Mie	1					0,0,0,0,0
	After summer atrophy epidemic
	2019.8.23	Mie	1	41 - 55 (48.5 ± 1.7)	5/10	16/20 (80%)	1.9 ± 0.4	3,2,3,0,3,3,3,3,3,2,3,0,2,2,0,0,2,2,0,0,3,3	Obtained a few days after the pearl farmer found the atrophy. The cumulative mortality rate of 0-year-old oysters at the end of the mass mortality was more than 50%.
	2019.9.19	Mie		27- 42 (34.8 ± 0.7)	NM	17/30 (56.7%)	1.2 ± 0.3	0,2,0,0,2,3,0,1,2,0,3,0,3,0,1,0,0,2,3,3,1,0,2,0,0,0,3,2,1,2	Randomly sampled, independent of disease onset.
	2019.10.24	Mie	0 and 1	14 - 58 (29.9 ± 3.0)	NM	31/38 (81.6%)	1.6 ± 0.2	3,2,0,0,2,1,1,1,3,3,2,2,3,0,3,2,3,1,3,0,3,2,3,3,0,0,2,1,1,1,0,1,3,2,2,1,1,1	Obtained a few days after the pearl farmer found the atrophy. The cumulative mortality rate of 0-year-old oysters at the end of the mass mortality was ca.70%.
	2019.11.20	Mie		50 - 57 (53.6 ± 0.5)	NM	11/20 (55%)	1.3 ± 0.3	2,0,0,0,1,2,13,3,32,3,0,0,0,3,3,0,0,0,3	Randomly sampled, independent of disease onset.
	2020.3.11	Mie	1	50 - 68 (56.1 ± 1.4)	0/10	13/20 (65%)	1.1 ± 0.3	0,2,2,0,2,1,1,1,0,0,1,2,2,0,1,0,2,1,0,3	Randomly sampled, independent of disease onset.
	2020.6.24	Mie	1	53 - 69 (59.0 ± 0.6)	7/44	24/44 (54.5%)	0.9 ± 0.2	2,1,3,3,0,0,2,1,2,0,1,0,2,0,0,0,3,0,0,0,2,0,0,0,2,0,2,1,0,0,2,1,2,1,2,1,1,1,0,0,2,0,1,0	Obtained a few days after the pearl farmer found the atrophy. Cumulative mortality rate at the time of sampling was ca. 20%.
	2021.6.23	Mie	1	25 - 66 (47.8 ± 1.8)	NM	22/36 (61.1%)	1.1 ± 0.2	0,0,3,0,0,0,1,0,0,1,3,0,2,0,1,0,1,3,1,1,,2,0,0,0,2,0,0,1,1,2,3,1,2,2,3,1	Obtained a few days after the pearl farmer found the atrophy.
	2019.8.29	Ehime	1	24 - 58 (39.5 ± 2.3)	NM	33/48 (68.8%)	1.3 ±0.2	3,1,0,0,1,0,1,0,1,0,0,3,1,3,2,1,0,3,3,0,0,0,0,2,1,0,1,1,3,3,0,0,2,2,3,3,1,1,3,1,3,2,2,0,1,1	Obtained a few days after the pearl farmer found the atrophy. The cumulative mortality rate of 0-year-old oysters reared at the farm at the time of sampling was ca. 33.3%.
	2019.10.17!	Ehime	0	26 - 45 (39.4 ± 0.4)	NM	39/68 (45.6%)	1.2 ± 0.2	0,3,3,0,3,0,0,1,2,0,3,1,2,2,0,0,1,0,3,3,3,0,0,0,1,0,0,0,3,0,2,3,1,0,0,2,3,2,3,1,2,0,2,0,0,1,1,0,1,0,0,0,3,0,1,3,0,1,1,0,2,3,0,3,2,3,1,3	Randomly sampled, independent of disease onset.
	2019.10.17!	Ehime	1	50 - 70 (59.9 ± 0.6)	5/30	36/60 (60%)	1.4 ± 0.2	0,0,1,2,0,0,3,0,0,0,0,1,0,0,3,1,0,0,2,0,0,2,3,3,3,0,1,0,1,1,0,0,0,2,2,2,2,3,0,3,3,3,3,3,3,2,0,0,3,2,3,3,2,2,0,3,0,1,1,3	Randomly sampled, independent of disease onset.
	2020.9.17!	Ehime	1-2	51 - 75 (61.3 ± 2.8)	NM	7/10 (70%)	1.4 ± 0.4	3,3,2,1,0,2,0,0,1,2	Randomly sampled, independent of disease onset.
	Nacre abnormalities and mean shell score were calculated for the incidence and score per shell, not per individual.
	＊: The number of oysters in which the soft body was atrophied / the number of oysters sacrificed from each group immediately before the start of the experiments. Nacre abnormalities remain after the oyster recovered from the disease, and hence, it cannot be used to judge if the oyster is diseased at the time of observation.
	＃: The number of valves in which nacre abnormality was observed / the number of tested valves from each group.
	!: Valves stored in a dry state at room temperature were observed on 2021.7.6.
	†: Nature of pigmentation was much darker than those typically found in the oysters affected by summer atrophy and rather similar to that of black-spot shell disease.
	NM: Not measured

## Sheet: Table3
	Table 3 Test 1: Cohabitation or injection with infected adult pearl oysters as the source of infection at two water temperatures
		Water temperature 22 - 23°C						Water temperature 25°C
		Infection experiments			Negative controls			Infection experiments			Negative controls
		Cohabitation	Injection		Cohabitation	Injection		Cohabitation	Injection		Cohabitation	Injection
	Mortality (dead/examined)	1/14	2/14		2/14	1/14		0/14	1/14		1/14	0/14
	Nacre abnormalities!	0.153846	9/12 *		0.0833333	0.0769231		5/14 *	9/13 *		0.0769231	0/14
	Mean shell scores of survivors	0.5 ± 0.3	2.8 ± 0.5#		0.3 ± 0.1	0.08 ± 0.07		0.9 ± 0.4	2.3 ± 0.4#		0.08 ± 0.08	0 ± 0
	Raw data: Shell scores of each survived pearl oysters	3,2,1,1,0,0,0,0,0,0,0,0,0,	5,5,4,4,3,3,3,3,1,1,1,0		1,1,1,0,0,0,0,0,0,0,0,0	1,0,0,0,0,0,0,0,0,0,0,0,0,0		4,3,2,2,1,0,0,0,0,0,0,0,0,0,0	4,4,3,3,3,3,3,3,2,1,1,0,0		1,0,0,0,0,0,0,0,0,0,0,0,0,0	0,0,0,0,0,0,0,0,0,0,0,0,0,0
	*: Significantly different from the negative control group (Fisher's exact test p < 0.05)
	#: Significantly different from the negative control group (Mann-Whitney U-test p < 0.05)
	!; The number of oysters in which nacre abnormality was observed/the number of surviving oysters

## Sheet: Table4
	Table 4 Test 2: Injection with juvenile pearl oysters as the source of infection
		Infection experiments	Raw data: Shell scores of each pearl oysters	Negative controls
	Mortality (dead/examined)	7/10*	-	0/10
	Nacre abnormalities of dead !	6/7	-	-
	Nacre abnormalities of survivor!	3/3	-	0/10
	Mean shell scores of dead oysters	1.7 ± 0.4	3,3,2,2,1,1,0	-
	Mean shell scores of survivors	3.3 ± 0.7	4,4,2	0 ± 0
	*: Significantly different from the negative control group (Fisher's exact test p < 0.05)
	!; The number of oysters in which nacre abnormality was observed/the number of observed oysters

## Sheet: table5
	Table 5. Test 3: Filterability of causative agent of suer atrophy of pearl oyster
		Pore size of membrane filters (μm) used for filtration of the hemolymph of affected oysters					Negative controls			Positive control
		0.8	0.45	0.22	0.1		Cohabitation with healthy oysters	Injection with healthy oyster hemolymph		Cohabitation with affected oysters
	Experimental seriese-1
	Total number of deaths	１	０	１	１		0	０		1
	Nacre abnormalities!	6/6*	7/7*	6/6*	5/6*		0/7	0/7		5/6*
	Mean shell scores of survivors	3.3 ± 0.7#	3.9 ± 0.8#	4.2 ± 0.5#	3.0 ± 0.8#		0 ± 0	0 ± 0		2.8 ± 0.9#
	Raw data: Shell scores of each survived pearl oysters	5,5,4,3,2,1	6,5,5,5,4,1,1,	6,5,5,3,3,3	5,4,4,4,1,0		0,0,0,0,0,0,0	0,0,0,0,0,0,0		4,3,3,2,1,0
	Experimental seriese-2
	Total number of deaths	２	１	３	１		0	０		2
	Nacre abnormalities!	5/5*	6/6*	3/4*	6/6*		2/7	0/7		5/5*
	Mean shell scores of survivors	3.4 ± 0.7#	2.5 ± 0.5#	3.3 ± 1.1#	4.3 ± 0.2#		0.3 ± 0.2	0 ± 0		3.2 ± 0.5#
	Raw data: Shell scores of each survived pearl oysters	5,5,3,3,1	4,3,3,3,1,1	5,4,4,0	5,5,4,4,4,4		1,1,0,0,0,0,0	0,0,0,0,0,0,0		5,4,3,2,2
	*: Significantly different from healthy oyster hemolymph - injected group (Fisher's exact test, p < 0.05).
	#: Significantly different from healthy oyster hemolymph - injected group in the same experimental series (Steel - Dwass test, p < 0.05).
	!; The number of oysters in which nacre abnormality was observed/the number of surviving oysters

## Sheet: Table 6
	Table 6. Test 4: Mortality and disease appearances in serial passages
		1-hour passage series					5-days passage series					10-days passage series					Negative control
	No. of passages	Dead/examined	Nacre abnormalities!	Mean shell scores of survivors	Raw data: Shell scores of each survived pearl oysters		Dead/examined	Nacre abnormalities!	Mean shell scores of survivors	Raw data: Shell scores of each survived pearl oysters		Dead/examined	Nacre abnormalities!	Mean shell scores of survivors	Raw data: Shell scores of each survived pearl oysters		Dead/examined	Nacre abnormalities!	Mean shell scores of survivors	Raw data: Shell scores of each survived pearl oysters
	1	0/10	10/10*	3.9 ± 0.6#	6,6,5,5,5,3,3,2,2,1		0/10	10/10*	3.9 ± 0.6#	6,6,5,5,5,3,3,2,2,1		0/10	10/10*	3.9 ± 0.6#	6,6,5,5,5,3,3,2,2,1		0/7	0/7	0 ± 0	0,0,0,0,0,0,0
	2	0/7	6/7*	3.0 ± 0.6	5,5,4,3,3,2,0		0/7	7/7*	4.4 ± 0.5#	6,6,6,4,4,4,3		0/7	7/7*	5.0 ± 0.5#	6,6,6,6,6,6,3
	3	0/7	0/7	0 ± 0	0,0,0,0,0,0,0		0/7	6/7*	3.1 ± 0.8#	6,6,3,3,2,2,0		3/7	3/4*	1.8 ± 0.6	3,2,1,0
	4						0/7	6/7*	3.3 ± 0.7#	6,4,4,3,3,2,0		0/7	6/7*	1.9 ± 0.6	5,2,1,1,1,1,0
	5											0/7	6/7*	3.5 ± 0.8#	6,5,4,4,3,1,0
	6											NM	NM	NM	NM
	7											NM	NM	NM	NM
	8											1/7	7/7*	4.0 ± 0.9#	6,6,5,3,1,1
	Blanks indicate that the experiments were not conducted.
	Passage 1 is common to all of the passage test series performed (i.e., every hour, 5 days, and 10 days)
	*: Significantly different from a negative control (Fisher's exact test, p < 0.05)
	#: Significantly different from a negative control (Steel-Dwass test, p < 0.05)
	!; The number of oysters in which nacre abnormality was observed/the number of surviving oysters
	NM: not measured

## Sheet: Table 7
	Table 7. Test 5: Sensitivity to chloroform of causative agent
		Test 5-1				Test 5-2
	Inoculum	Nacre abnormalities!	Mean shell score of survivors	Raw data: Shell scores of each survived pearl oysters		Nacre abnormalities!	Mean shell score of survivors	Raw data: Shell scores of each survived pearl oysters
	Chloroform-treated	5/5	2.8 ± 0.9*	5,5,2,1,1		3/7	1.0 ± 0.5	3,3,1,0,0,0,0
	Non-treated	5/5	3.6 ± 0.7*	5,5,4,3,1		3/7	1.4 ± 0.8	5,3,2,0,0,0,0
	Hemolymph from healthy pearl oyster	0/5	0 ± 0	0,0,0,0,0		0/5	0 ± 0	0,0,0,0,0
	*: Significantly different from the group injected with healthy pearl oyster hemolymph (Steel - Dwass test, p < 0.05)
	!; The number of oysters in which nacre abnormality was observed/the number of surviving oysters

## Sheet: Table8
		Table 8. Test 6: Thermal stability of causative agent of suer atrophy of pearl oyster pathogenicity
			Temperature					Negative control
			on-ice	40℃	50℃	60℃		Injection with healthy oyster hemolymph
		Test-1
		Nacre abnormalities!	5/5*	4/5*	0/5	0/5		0/5
		Mean shell scores of survivors	2.0 ± 0.4	2.0 ± 0.6	0 ± 0	0 ± 0		0 ± 0
		Raw data: Shell scores of each survived pearl oysters	2,1,3,1,3#	3,4,0,1,2	0,0,0,0,0	0,0,0,0,0		0,0,0,0,0
		Test-2
		Nacre abnormalities!	4/5*	3/5*	4/5*	0/5		0/5
		Mean shell scores of survivors	2.8 ± 0.9	2.2 ± 0.8	2.4 ± 0.8	0 ± 0		0 ± 0
		Raw data: Shell scores of each survived pearl oysters	4,0,3,2,5	0,3,0,4,4	3,3,0,4,2	0,0,0,0,0		0,0,0,0,0
		*: Significantly different from the group injected with healthy pearl oyster hemolymph (Fisher's exact test, p < 0.05).
		#: Significantly different from the group injected with healthy pearl oyster hemolymph (Steel - Dwass test, p < 0.05).
		!; The number of oysters in which nacre abnormality was observed/the number of surviving oysters

## Sheet: Supplemental table1
	Supplemental Table 1 Infection test by cohabitation with affected pearl oysters
		Source of infection (Donors)				Mean shell scores (N=5) of recipients sampled on different days of cohabitation				Raw data: Shell scores of each survived pearl oysters
	Test groups	Collection site, age and number of oysters used as donors for each group	Mean shell scores (N=5)	Raw data: Shell scores of each survived pearl oysters		42 days	63 days	111 days		42 days	63 days	111 days
	Group 1-1	Mie Prefecture, 1+, N=4	4.2 ± 0.7	6,5,4,4,2		0.4 ± 0.4	1.0 ± 0.5	0.8 ± 0.5		2,0,0,0,0	2,2,1,0,0	2,2,0,0,0
	Group 1-2	ditto	ditto	ditto		0 ± 0	0.8 ± 0.5	0 ± 0		0,0,0,0,0	2,2,0,0,0	0,0,0,0,0
	Group 2-1	Mie Prefecture, 2+, N=10	3.2 ± 0.9	5,5,4,2,0		0 ± 0	0.4 ± 0.4	0.4 ± 0.4		0,0,0,0,0	2,0,0,0,0	2,0,0,0,0
	Group 2-2	ditto	ditto	ditto		0 ± 0	0 ± 0	0.5 ± 0.4		0,0,0,0,0	0,0,0,0,0	3,0,0,0,0
	Negative control 1	Ishikawa Prefecture, 2+, N=10	0 ± 0	0,0,0,0,0		0 ± 0	0 ± 0	0 ± 0		0,0,0,0,0	0,0,0,0,0	0,0,0,0,0
	Negative control 2	ditto	ditto	ditto		0 ± 0	0 ± 0	0 ± 0		0,0,0,0,0	0,0,0,0,0	0,0,0,0,0
	Healthy pearl oysters (N=20) obtained from Ishikawa Prefecture were reared with donor oysters in the same tank for each experiment. Thus, a total of 140 healthy oysters (including the healthy oysters used as donors in the control tanks) were used.

## Sheet: Supplemental table2
	Supplemental Table 2 Infection test by hemolymph injection
	Test groups	Inoculum		Mean shell scores of 10 surviving oysters	Raw data: Shell scores of each survived pearl oysters
	Group 1	Supernatant of affected pearl oyster hemolymph		0 ± 0	0,0,0,0,0,0,0,0,0,0
	Group 2	ditto		0.2 ± 0.1	1,1,0,0,0,0,0,0,0,0
	Negativ control 1	Autoclaved seawater		0 ± 0	0,0,0,0,0,0,0,0,0,0
	Negativ control 2	ditto		0 ± 0	0,0,0,0,0,0,0,0,0,0
	Healthy pearl oysters (N=20) obtained from Ishikawa Prefecture were used as the recipients in each group. A total of 80 healty oysters were used.
	Supernatant of hemolymph obtained from affected pearl oysters (N=10, mean shell score: 5.0 ± 0.6) from Mie Prefecture was used as the inoculum.
